# Supplementary material for: Intraspecific phenotypic variation in life history traits of Daphnia galeata populations in response to fish kairomones
Source: PeerJ journal article supplement (doi:10.7717/peerj.5746), 2018-10-17

A

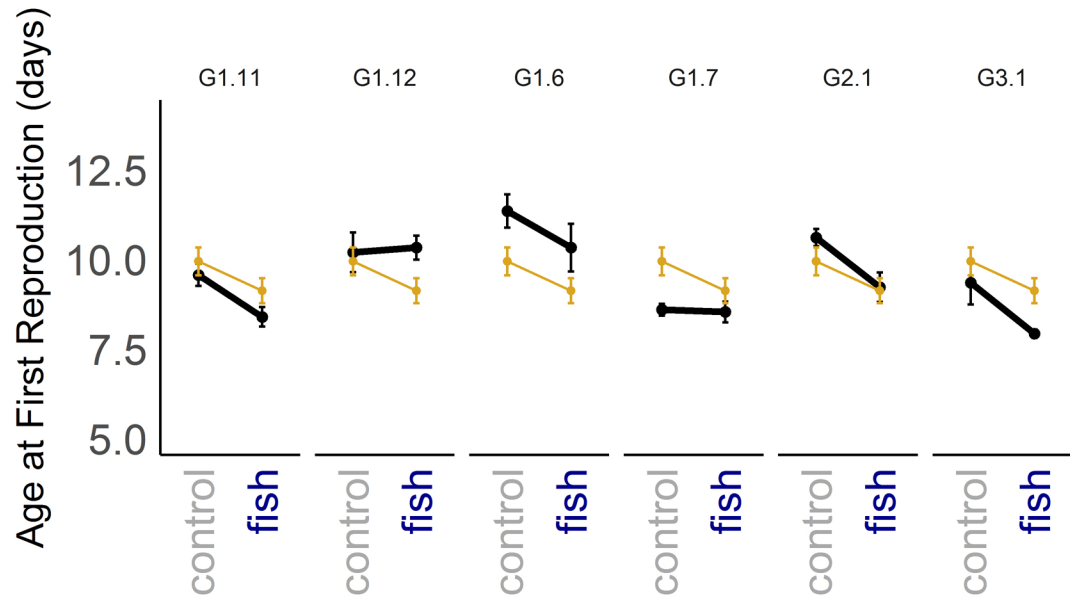

B

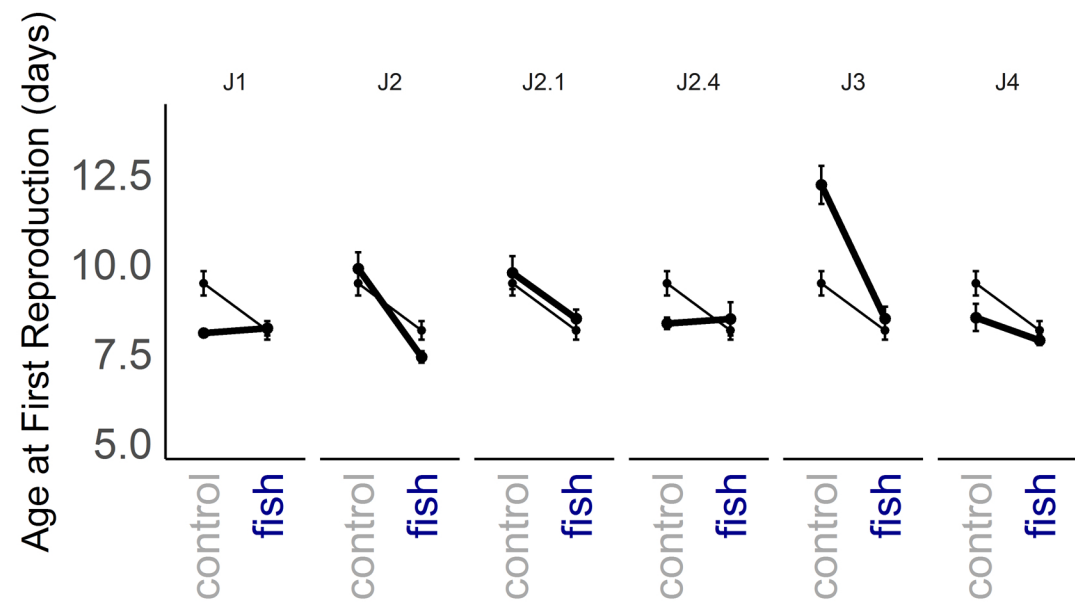

C

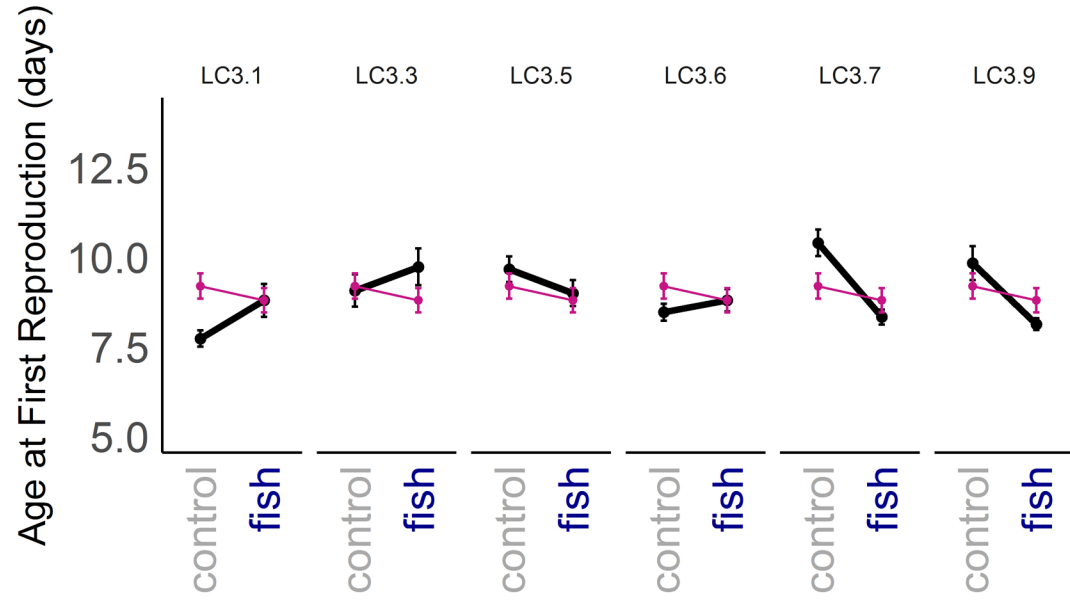

D

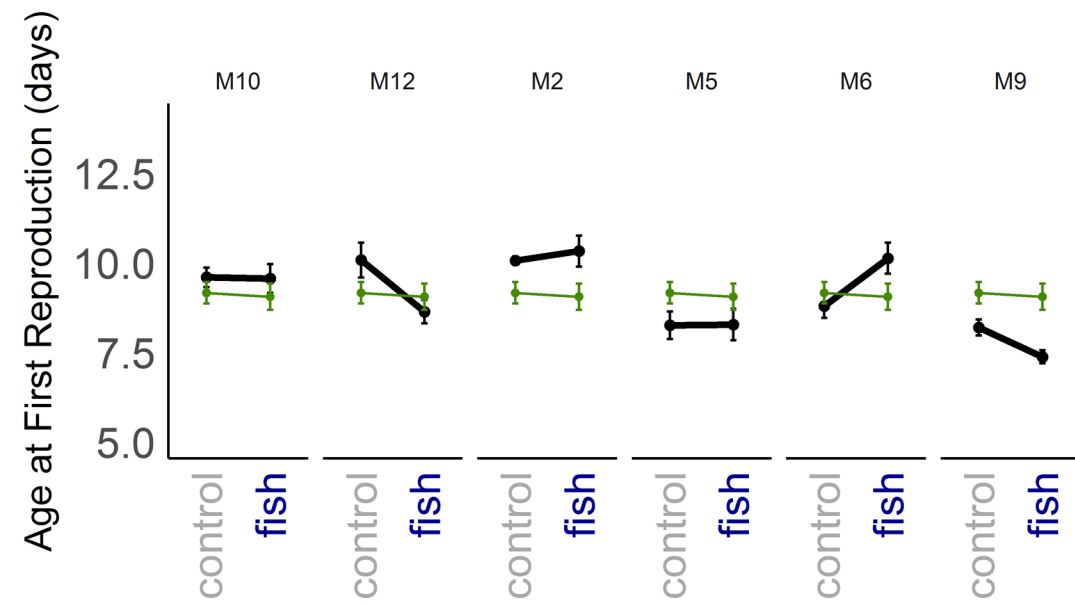

Supplement: FigureS2.pdf [file FigureS2.pdf]
