# Supplementary material for: Intraspecific phenotypic variation in life history traits of Daphnia galeata populations in response to fish kairomones
Source: PeerJ journal article supplement (doi:10.7717/peerj.5746), 2018-10-17

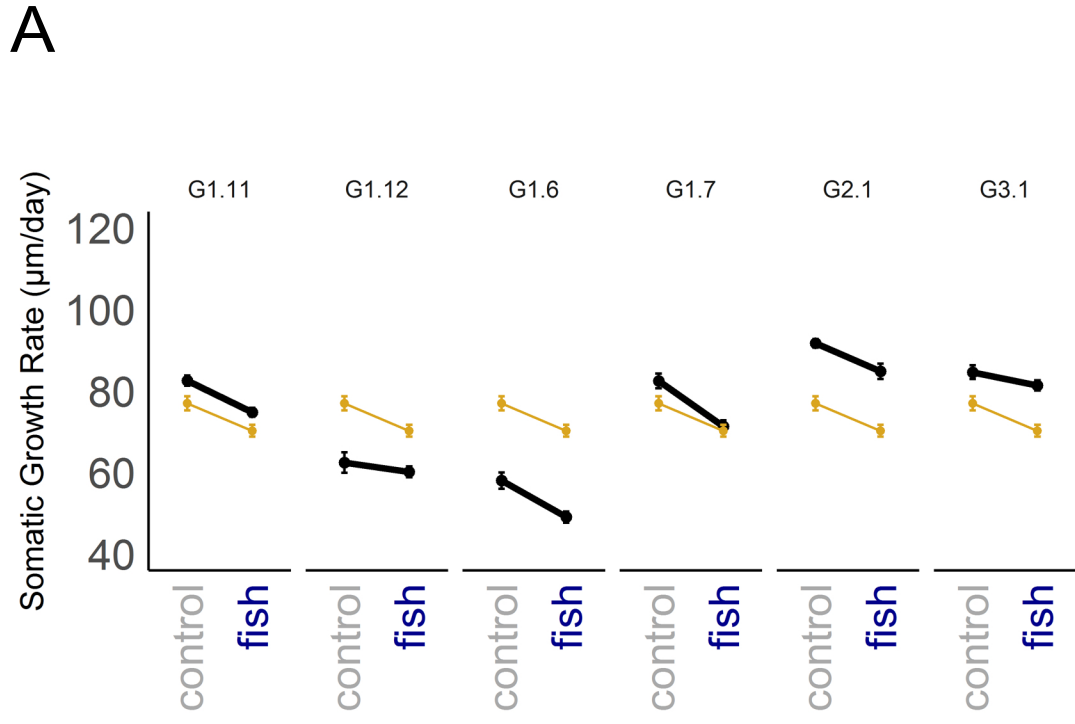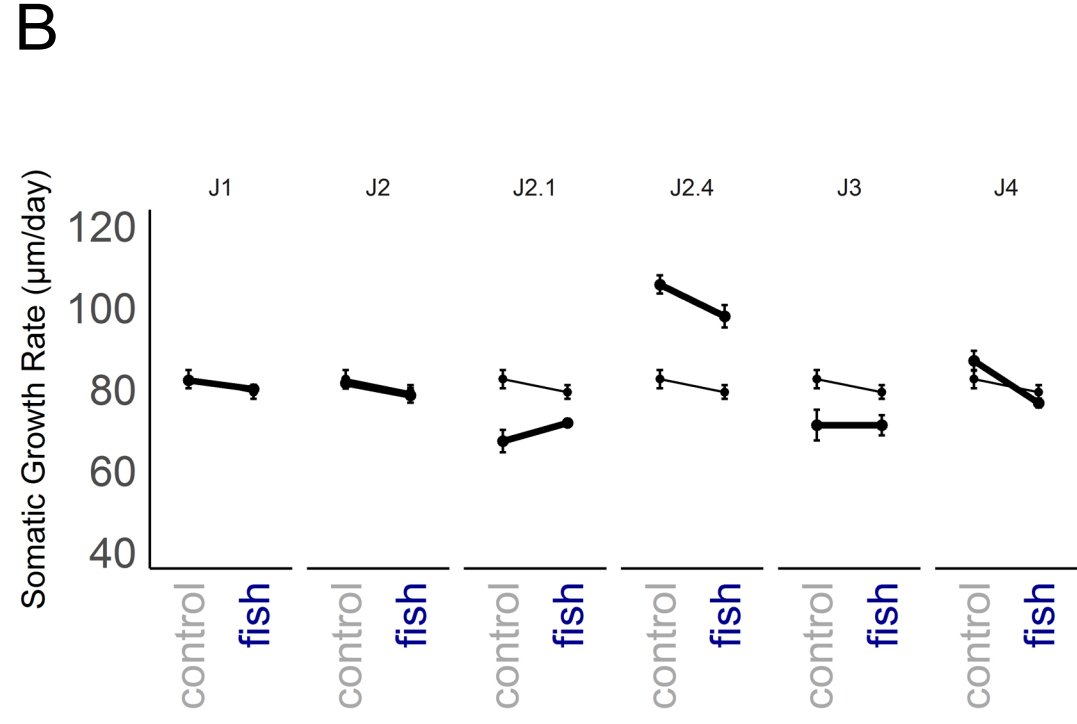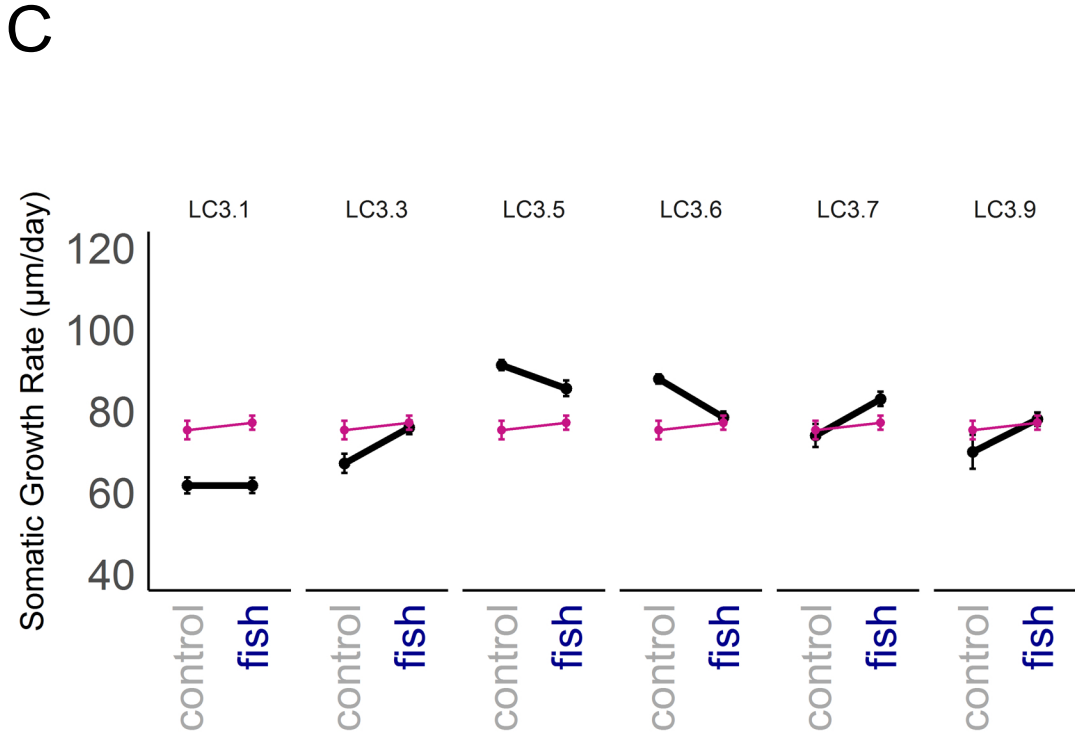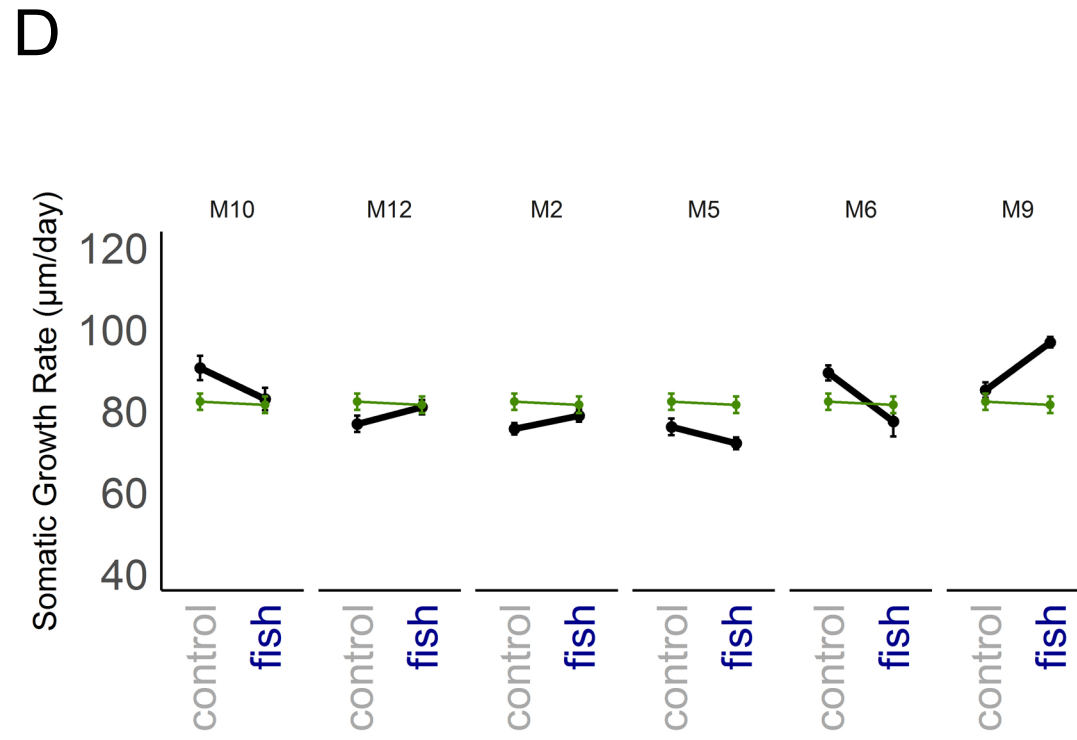

Supplement: FigureS6.pdf [file FigureS6.pdf]
